# Supplementary material for: Effect of channel length on the electrical response of carbon nanotube field-effect transistors to deoxyribonucleic acid hybridization
Source: publisher site journal article supplement (doi:10.3762/bjnano.5.217), 2014-11-12
Supplement: Additional file 1 [file 2190-4286-5-217-S1.pdf]

**Supporting Information**

**for**

**Effect of channel length on the electrical response of**

**carbon nanotube field-effect transistors to**

**deoxyribonucleic acid hybridization**

Hari Krishna Salila Vijayalal Mohan<sup>\*1</sup>, Jianing An<sup>1</sup>, Yani Zhang<sup>2,3</sup>, Chee How Wong<sup>1</sup> and Lianxi Zheng<sup>\*1,4</sup>

Address: <sup>1</sup>School of Mechanical and Aerospace Engineering, Nanyang Technological University, 50 Nanyang Avenue, 639798, Singapore, <sup>2</sup>Temasek Laboratories, Nanyang Technological University, 50 Nanyang Avenue, 639798, Singapore, <sup>3</sup>Science and Technology on Thermostructural Composite Materials Laboratory, Northwestern Polytechnical University, 710072, Xi'an, PR China, and <sup>4</sup>Department of Mechanical Engineering, Khalifa University of Science, Technology & Research (KUSTAR), P.O. Box 127788, Abu Dhabi, United Arab Emirates

Email: Hari Krishna Salila Vijayalal Mohan\* - hari1@e.ntu.edu.sg; Lianxi Zheng\* - Lianxi.zheng@kustar.ac.ae

\* Corresponding author

## Additional experimental data

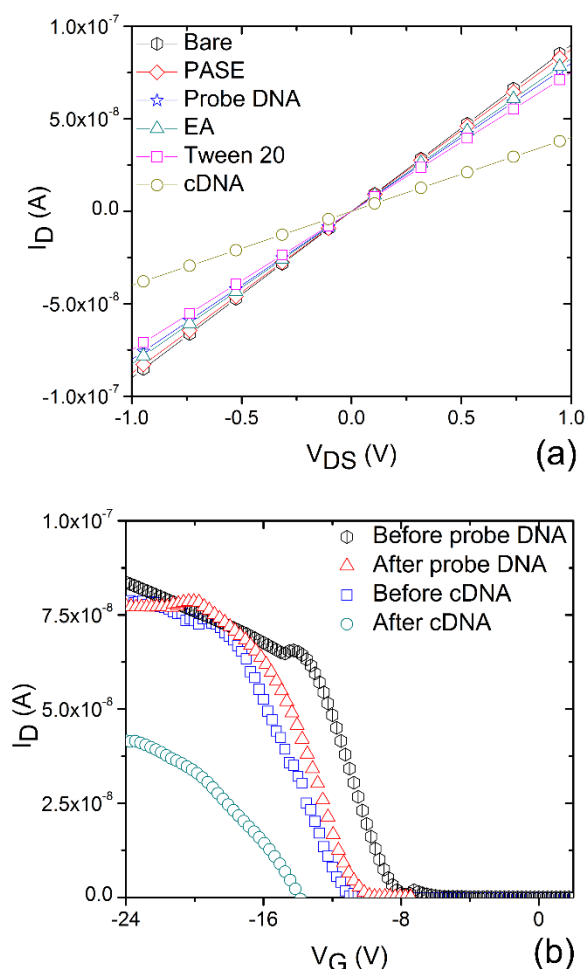

**Figure S1:** (a)  $I_D$ – $V_{DS}$  and (b)  $I_D$ – $V_G$  curves of SWCNT-based FETs showing the various functionalization steps with both channel and junction exposed to cDNA ( $L = 300 \mu\text{m}$ ). The “before probe DNA” and “after probe DNA”  $I_D$ – $V_G$  curves represent the PASE functionalization and probe DNA incubation steps, respectively. The “before cDNA” step corresponds to the incubation of probe DNA-immobilized FETs with EA and Tween 20. The “after cDNA” step represents the recording after incubation with cDNA.

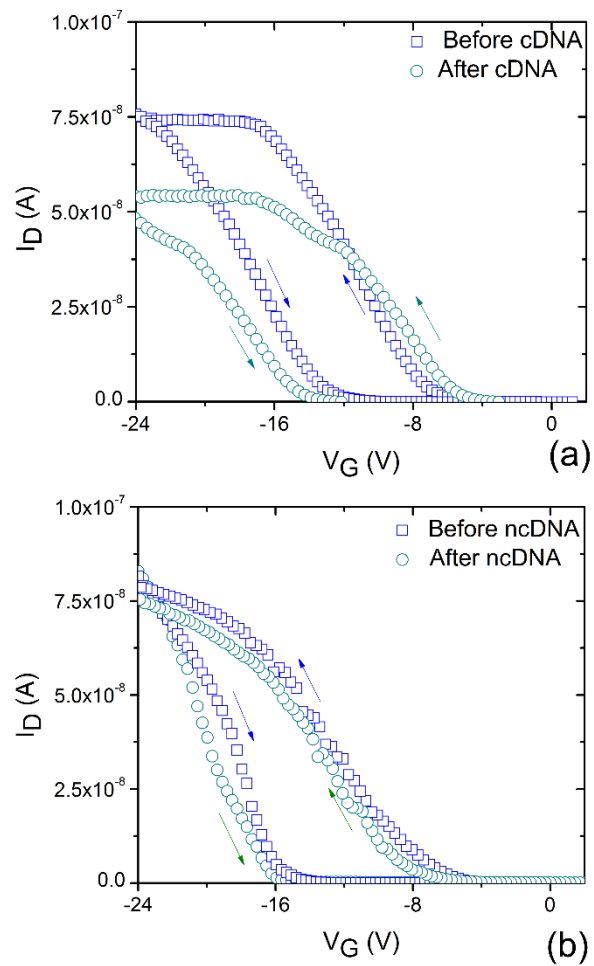

**Figure S2:**  $I_D$ - $V_G$  plots of SWCNT-based FETs ( $L = 300 \mu\text{m}$ ) with only the channel exposed to (a) cDNA and (b) ncDNA. The “before cDNA” step corresponds to the incubation of probe DNA-immobilized FETs with EA and Tween 20. The “after cDNA” step represents the recording after incubation with cDNA. The arrows indicate the direction of the gate voltage sweep.

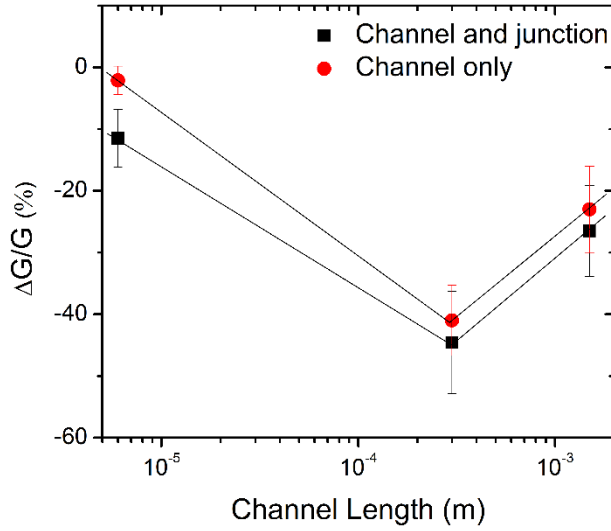

**Figure S3:** The variation in the conductance response for the devices with the channel and junction exposed ( $\Delta G_{\text{on}}/G_{\text{on}}$ ) and devices with only the channel exposed ( $\Delta G_{\text{ch}}/G_{\text{ch}}$ ) to cDNA, both as a function of  $L$ .  $\Delta G_{\text{ch}}/G_{\text{ch}} \cong \Delta G_{\text{on}}/G_{\text{on}}$  for  $L = 300 \mu\text{m}$  and  $1500 \mu\text{m}$ , which indicates the dominance of the change in channel resistance ( $\Delta R_{\text{ch}}$ ) after hybridization.  $\Delta G_{\text{on}}/G_{\text{on}} > \Delta G_{\text{ch}}/G_{\text{ch}}$  for  $L = 6 \mu\text{m}$ , which indicates the additional contribution of the change in contact resistance ( $\Delta R_{\text{c}}$ ) to  $\Delta G_{\text{on}}/G_{\text{on}}$  after hybridization. The solid lines are a guide to the eye.

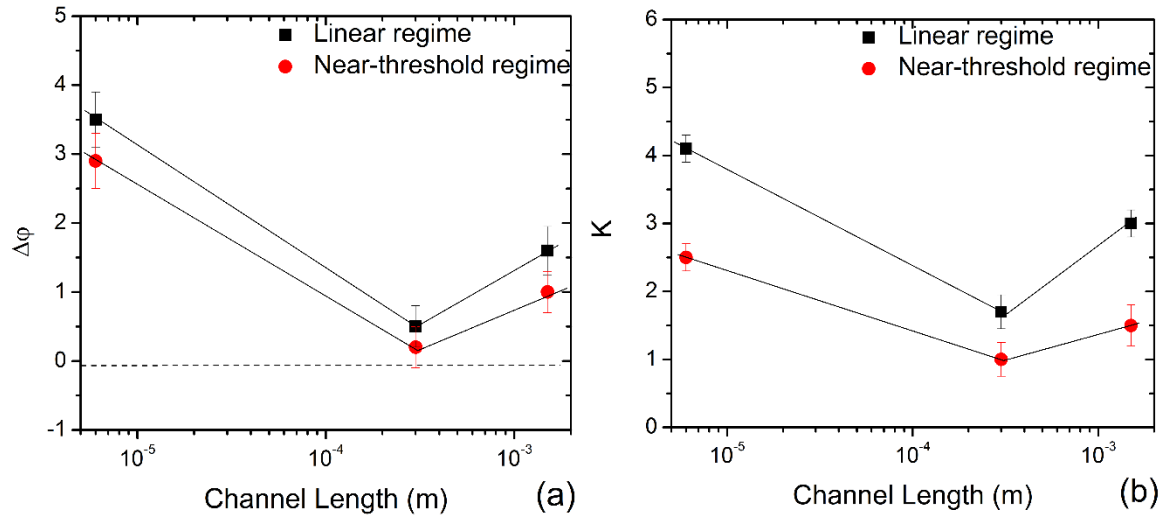

**Figure S4:** The variation in (a)  $\Delta\phi$  and (b)  $K$  with  $L$  in the linear and near-threshold regimes for the reverse sweep. The solid lines are a guide to the eye.
